# Supplementary material
Source: ML conference proceedings conference paper supplement (https://proceedings.neurips.cc/paper_files/paper/2019/hash/f0d7053396e765bf52de12133cf1afe8-Abstract.html)
Supplement: Supplementary file [file f0d7053396e765bf52de12133cf1afe8-Supplemental.zip]

# Supplementary material

The theorems stated in the paper are consequences of Proposition 2, Proposition 4 and Proposition 3. These results are proved in subsequent sections, which are organized as follows. Section 8 contains tight risk bounds for general matrices satisfying the transfer principle and the incoherence property. We then show in Section 9 that the Gaussian design satisfies, with high probability, both the transfer principle and the incoherence property. We complete the paper by showing how Theorem 1, Theorem 2 and Theorem 3 can be deduced from Proposition 2, Proposition 4 and Proposition 3.

To help the reader to navigate through the proof without losing the thread, the diagram below outlines the relations between different auxiliary results.

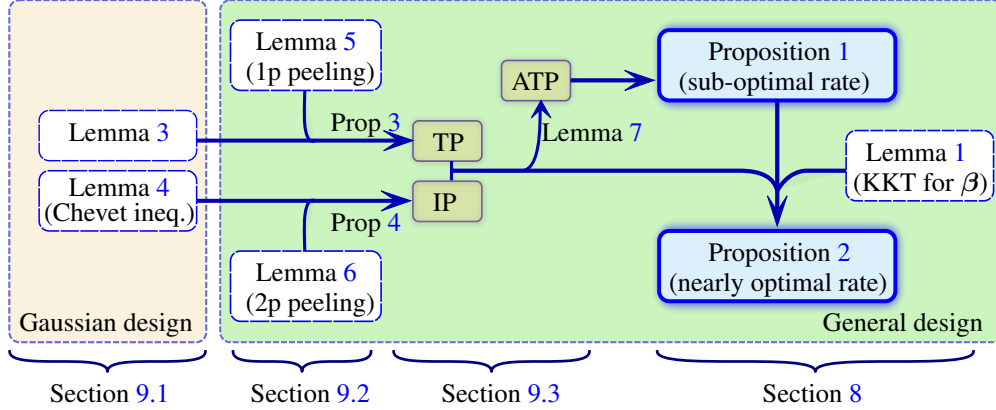

Thus, Proposition 1 establishes a risk bound valid under  $\text{ATP}_\Sigma$ . This risk bound is sub-optimal for Gaussian designs, but it is an intermediate step for getting the final risk bound, established in Proposition 2. The latter follows from the  $\text{TP}_\Sigma$ ,  $\text{IP}_\Sigma$  and an auxiliary result proved in Lemma 3. The fact that the  $\text{TP}_\Sigma$  holds true for Gaussian matrices is proved in Proposition 3 as a consequence of Lemma 3 and one-parameter peeling (Lemma 5). Similarly, the fact that the  $\text{IP}_\Sigma$  holds true for Gaussian matrices is proved in Proposition 4 as a consequence of Lemma 4 and two-parameter peeling (Lemma 6).

## 8 Main technical results for general design matrices

In the sequel, we denote by  $\mathbb{S}^{k-1}$  the unit sphere in  $\mathbb{R}^k$  with respect to the Euclidean norm centered at the origin. With a slight abuse of notation,  $\mathbb{R}^k$  will be identified with  $\mathbb{R}^{k \times 1}$ . The unit ball with respect to the  $\ell_p$ -norm centered at the origin will be denoted by  $\mathbb{B}_p^k$ . Given a matrix  $\Sigma \in \mathbb{R}^{p \times p}$ , we will use the definition  $\rho(\Sigma) := \max_{j \in [p]} \sqrt{\Sigma_{jj}}$  without further notice. We will use notation  $\Delta^\beta = \hat{\beta} - \beta^*$ ,  $\Delta^\theta = \hat{\theta} - \theta^*$  and  $\Delta = [\Delta^\beta; \Delta^\theta] \in \mathbb{R}^{p+n}$ . We denote by  $S$  the support of  $\beta^*$  and by  $O$  that of  $\theta^*$ . We know that  $\text{Card}(S) \leq s$  and  $\text{Card}(O) \leq o$ . Throughout, we set  $\gamma = \lambda_s/\lambda_o$  and define the dimension reduction cone  $\mathcal{C}_{S,O}(c_0, \gamma) = \{(u, v) \in \mathbb{R}^n \times \mathbb{R}^p : \|u_{O^c}\|_1 + \gamma\|v_{S^c}\|_1 \leq c_0(\|u_O\|_1 + \gamma\|v_S\|_1)\}$ , where  $c_0 \geq 1$  is a constant.

### 8.1 Augmented transfer principle implies the sub-optimal rate

This section is devoted to the proof of the fact that the estimators  $\hat{\beta}$  and  $\hat{\theta}$  achieve, up to logarithmic factors, the rates

$$\frac{s}{n\kappa^2} + \frac{o}{n} \quad \text{and} \quad \frac{s}{\sqrt{n}\kappa^2} + \frac{o}{\sqrt{n}}$$

for squared  $\ell_2$  error and  $\ell_1$  errors, respectively. This is true under suitable conditions on the design matrix  $\mathbf{X}$ . These rates are not optimal, but they will help us to obtain the optimal rates.

462 **Proposition 1.** Let  $\Sigma$  satisfy the  $\text{RE}(s, 5)$  with constant  $\kappa > 0$ . Let  $c_1, c_2, c_3$  and  $\gamma$  be some positive  
 463 real numbers satisfying

$$8(c_2 \vee \gamma c_3) \left( \frac{s}{\kappa^2} + \frac{6.25o}{\gamma^2} \right)^{1/2} \leq c_1.$$

464 Assume that on some event  $\Omega$ , the following conditions are met:

465 (i)  $\mathbf{X}$  satisfies the  $\text{ATP}_\Sigma(c_1; c_2; c_3)$ .

466 (ii)  $\lambda_s = \gamma \lambda_o \geq (2/n) \|\mathbf{X}^\top \boldsymbol{\xi}\|_\infty$ , and  $\lambda_o \geq (2/\sqrt{n}) \|\boldsymbol{\xi}\|_\infty$ .

467 Then, on the same event  $\Omega$ , we have  $\Delta \in \mathcal{C}_{S,O}(3, \lambda_s/\lambda_o)$  and

$$\begin{aligned} \|\Sigma^{1/2} \Delta^\beta\|_2^2 + \|\Delta^\theta\|_2^2 &\leq \frac{36}{c_1^4} \left( \frac{\lambda_s^2 s}{\kappa^2} + 6.25 \lambda_o^2 o \right), \\ \lambda_s \|\Delta^\beta\|_1 + \lambda_o \|\Delta^\theta\|_1 &\leq \frac{24}{c_1^2} \left( \frac{\lambda_s^2 s}{\kappa^2} + 6.25 \lambda_o^2 o \right). \end{aligned} \quad (14)$$

468 *Proof.* First, we use the KKT conditions to infer that for some vectors  $\mathbf{u} \in \mathbb{B}_\infty^n$  and  $\mathbf{v} \in \mathbb{B}_\infty^p$  such  
 469 that  $\mathbf{u}^\top \hat{\boldsymbol{\theta}} = \|\hat{\boldsymbol{\theta}}\|_1$  and  $\mathbf{v}^\top \hat{\boldsymbol{\beta}} = \|\hat{\boldsymbol{\beta}}\|_1$ , we have

$$[\mathbf{X}^{(n)} \mathbf{I}_n]^\top (\mathbf{y}^{(n)} - \mathbf{X}^{(n)} \hat{\boldsymbol{\beta}} - \hat{\boldsymbol{\theta}}) = [\lambda_s \mathbf{v}; \lambda_o \mathbf{u}].$$

470 Using the facts that  $\mathbf{y}^{(n)} = \mathbf{X}^{(n)} \boldsymbol{\beta}^* + \boldsymbol{\theta}^* + \boldsymbol{\xi}^{(n)}$  and rearranging the terms, the last display takes the  
 471 form

$$[\mathbf{X}^{(n)} \mathbf{I}_n]^\top [\mathbf{X}^{(n)} \mathbf{I}_n] \Delta = [(\mathbf{X}^{(n)})^\top \boldsymbol{\xi}^{(n)}; \boldsymbol{\xi}^{(n)}] + [\lambda_s \mathbf{v}; \lambda_o \mathbf{u}].$$

472 Multiplying the last display from the left by  $\Delta^\top$ , we arrive at

$$\|[\mathbf{X}^{(n)} \mathbf{I}_n] \Delta\|_2^2 = (\Delta^\beta)^\top (\mathbf{X}^{(n)})^\top \boldsymbol{\xi}^{(n)} + (\Delta^\theta)^\top \boldsymbol{\xi}^{(n)} + \lambda_s (\Delta^\beta)^\top \mathbf{v} + \lambda_o (\Delta^\theta)^\top \mathbf{u}.$$

473 The relations  $\|\mathbf{v}\|_\infty \leq 1$  and  $\mathbf{v}^\top \hat{\boldsymbol{\beta}} = \|\hat{\boldsymbol{\beta}}\|_1$  imply that  $(\Delta^\beta)^\top \mathbf{v} = (\boldsymbol{\beta}^* - \hat{\boldsymbol{\beta}})^\top \mathbf{v} = (\boldsymbol{\beta}^*)^\top \mathbf{v} - \|\hat{\boldsymbol{\beta}}\|_1 \leq$   
 474  $\|\boldsymbol{\beta}^*\|_1 - \|\hat{\boldsymbol{\beta}}\|_1$ . Similarly,  $(\Delta^\theta)^\top \mathbf{u} \leq \|\boldsymbol{\theta}^*\|_1 - \|\hat{\boldsymbol{\theta}}\|_1$ . Combining these bounds with the duality  
 475 inequality and the last display, we infer that

$$\begin{aligned} \|[\mathbf{X}^{(n)} \mathbf{I}_n] \Delta\|_2^2 &\leq \|\Delta^\beta\|_1 \|(\mathbf{X}^{(n)})^\top \boldsymbol{\xi}^{(n)}\|_\infty + \|\Delta^\theta\|_1 \|\boldsymbol{\xi}^{(n)}\|_\infty \\ &\quad + \lambda_s (\|\boldsymbol{\beta}^*\|_1 - \|\hat{\boldsymbol{\beta}}\|_1) + \lambda_o (\|\boldsymbol{\theta}^*\|_1 - \|\hat{\boldsymbol{\theta}}\|_1) \\ &\stackrel{(ii)}{\leq} (\lambda_s/2) \|\Delta^\beta\|_1 + (\lambda_o/2) \|\Delta^\theta\|_1 + \lambda_s (\|\boldsymbol{\beta}^*\|_1 - \|\hat{\boldsymbol{\beta}}\|_1) + \lambda_o (\|\boldsymbol{\theta}^*\|_1 - \|\hat{\boldsymbol{\theta}}\|_1). \end{aligned} \quad (15)$$

476 Recall that  $J = \{j : \beta_j \neq 0\}$  and  $O = \{i : \theta_i^* \neq 0\}$ . We have

$$\begin{aligned} \|\Delta^\beta\|_1 + 2\|\boldsymbol{\beta}^*\|_1 - 2\|\hat{\boldsymbol{\beta}}\|_1 &= \|\Delta^\beta\|_1 + 2\|\boldsymbol{\beta}_S^*\|_1 - 2\|\hat{\boldsymbol{\beta}}_S\|_1 - 2\|\Delta_{S^c}^\beta\|_1 \\ &\leq \|\Delta^\beta\|_1 + 2\|\Delta_S^\beta\|_1 - 2\|\Delta_{S^c}^\beta\|_1 \\ &= 3\|\Delta_S^\beta\|_1 - \|\Delta_{S^c}^\beta\|_1. \end{aligned}$$

477 The same type of reasoning leads to  $\|\Delta^\theta\|_1 + 2\|\boldsymbol{\theta}^*\|_1 - 2\|\hat{\boldsymbol{\theta}}\|_1 \leq 3\|\Delta_O^\theta\|_1 - \|\Delta_{O^c}^\theta\|_1$ . Combining  
 478 these inequalities with (15), we get

$$\|[\mathbf{X}^{(n)} \mathbf{I}_n] \Delta\|_2^2 \leq (\lambda_s/2) (3\|\Delta_S^\beta\|_1 - \|\Delta_{S^c}^\beta\|_1) + (\lambda_o/2) (3\|\Delta_O^\theta\|_1 - \|\Delta_{O^c}^\theta\|_1).$$

479 On the one hand, since the left hand side is non negative, this obviously implies that the vector  $\Delta$   
 480 belongs to the dimension reduction cone  $\mathcal{C}_{S,O}(3, \gamma)$ . On the other hand, using the  $\text{ATP}_\Sigma$ ,

$$\begin{aligned} c_1 \|\Sigma^{1/2} \Delta^\beta; \Delta^\theta\|_2 - c_2 \|\Delta^\beta\|_1 - c_3 \|\Delta^\theta\|_1 \\ \leq \sqrt{(\lambda_s/2) (3\|\Delta_S^\beta\|_1 - \|\Delta_{S^c}^\beta\|_1) + (\lambda_o/2) (3\|\Delta_O^\theta\|_1 - \|\Delta_{O^c}^\theta\|_1)}. \end{aligned} \quad (16)$$

481 We split the rest of the proof into two parts: the first corresponds to the case  $5\|\Delta_S^\beta\|_1 \geq \|\Delta_{S^c}^\beta\|_1$   
 482 while the second treats the case  $5\|\Delta_S^\beta\|_1 \leq \|\Delta_{S^c}^\beta\|_1$ . The main goal of this splitting is to avoid  
 483 imposing strong assumption on  $\Sigma$  such as  $\sigma_{\min}(\Sigma) > 0$  and to use the RE condition only.

484 **Case 1:**  $5\|\Delta_S^\beta\|_1 \geq \|\Delta_{S^c}^\beta\|_1$ . This is the simple case, since we know that  $\Delta^\beta$  lies in the suitable  
 485 dimension reduction cone for which we can use the RE condition. We first use the already  
 486 proved fact  $\Delta \in \mathcal{C}_{S,O}(3, \gamma)$  to infer that

$$\begin{aligned} c_2\|\Delta^\beta\|_1 + c_3\|\Delta^\theta\|_1 &\leq \left(\frac{c_2}{\lambda_s} \vee \frac{c_3}{\lambda_o}\right)(\lambda_s\|\Delta^\beta\|_1 + \lambda_o\|\Delta^\theta\|_1) \\ &\leq 4\left(\frac{c_2}{\lambda_s} \vee \frac{c_3}{\lambda_o}\right)(\lambda_s\|\Delta_S^\beta\|_1 + \lambda_o\|\Delta_O^\theta\|_1) \\ &\leq 4\left(\frac{c_2}{\lambda_s} \vee \frac{c_3}{\lambda_o}\right)\left(\frac{\lambda_s^2 s}{\varkappa^2} + \lambda_o^2 o\right)^{1/2} (\varkappa^2\|\Delta_S^\beta\|_2^2 + \|\Delta_O^\theta\|_2^2)^{1/2} \\ &\leq 4\left(\frac{c_2}{\lambda_s} \vee \frac{c_3}{\lambda_o}\right)\left(\frac{\lambda_s^2 s}{\varkappa^2} + \lambda_o^2 o\right)^{1/2} \|[\Sigma^{1/2}\Delta^\beta; \Delta^\theta]\|_2. \end{aligned} \quad (17)$$

487 Similarly, the right hand side of (16) can be bounded by the square-root of the expression

$$\begin{aligned} 3(\lambda_s/2)\|\Delta_S^\beta\|_1 + 3(\lambda_o/2)\|\Delta_O^\theta\|_1 &\leq 1.5\left(\frac{\lambda_s^2 s}{\varkappa^2} + \lambda_o^2 o\right)^{1/2} (\varkappa^2\|\Delta_S^\beta\|_2^2 + \|\Delta_O^\theta\|_2^2)^{1/2} \\ &\leq 1.5\left(\frac{\lambda_s^2 s}{\varkappa^2} + \lambda_o^2 o\right)^{1/2} \|[\Sigma^{1/2}\Delta^\beta; \Delta^\theta]\|_2. \end{aligned} \quad (18)$$

488 To ease notation, we define  $A = 4\left(\frac{c_2}{\lambda_s} \vee \frac{c_3}{\lambda_o}\right)\left(\frac{\lambda_s^2 s}{\varkappa^2} + \lambda_o^2 o\right)^{1/2}$ ,  $B = 1.5\left(\frac{\lambda_s^2 s}{\varkappa^2} + \lambda_o^2 o\right)^{1/2}$  and  
 489  $x = \|[\Sigma^{1/2}\Delta^\beta; \Delta^\theta]\|_2$ . These notations are valid in this proof only. From (16), (17), (18),  
 490 we get

$$c_1 x \leq Ax + \sqrt{Bx} \implies x \leq \frac{B}{(c_1 - A)^2}$$

491 provided that  $A \leq c_1$ . Assuming  $2A \leq c_1$ , we get

$$\|\Sigma^{1/2}\Delta^\beta\|_2^2 + \|\Delta^\theta\|_2^2 \leq \frac{16B^2}{c_1^4}.$$

492 For deriving the bound on the  $\ell_1$  norms of the errors, we first use the fact that  $\Delta$  lies in the  
 493 dimension reduction cone, followed by the Cauchy-Schwarz inequality, to get

$$\begin{aligned} \lambda_s\|\Delta^\beta\|_1 + \lambda_o\|\Delta^\theta\|_1 &\leq 4(\lambda_s\|\Delta_S^\beta\|_1 + \lambda_o\|\Delta_O^\theta\|_1) \\ &\leq 4\left(\frac{\lambda_s^2 s}{\varkappa^2} + \lambda_o^2 o\right)^{1/2} \|[\Sigma^{1/2}\Delta^\beta; \Delta^\theta]\|_2 \\ &\leq \frac{16B}{c_1^2} \left(\frac{\lambda_s^2 s}{\varkappa^2} + \lambda_o^2 o\right)^{1/2} \\ &= \frac{24}{c_1^2} \left(\frac{\lambda_s^2 s}{\varkappa^2} + \lambda_o^2 o\right). \end{aligned}$$

494 **Case 2:**  $5\|\Delta_S^\beta\|_1 < \|\Delta_{S^c}^\beta\|_1$ . In this case, we can infer from the already proved fact  $\Delta \in \mathcal{C}_{S,O}(3, \gamma)$   
 495 that

$$2\gamma\|\Delta_S^\beta\|_1 + \|\Delta_{O^c}^\theta\|_1 \leq 3\|\Delta_O^\theta\|_1.$$

496 Hence, we have

$$\begin{aligned} c_2\|\Delta^\beta\|_1 + c_3\|\Delta^\theta\|_1 &\leq \left(\frac{c_2}{\lambda_s} \vee \frac{c_3}{\lambda_o}\right)(\lambda_s\|\Delta^\beta\|_1 + \lambda_o\|\Delta^\theta\|_1) \\ &\leq 4\left(\frac{c_2}{\lambda_s} \vee \frac{c_3}{\lambda_o}\right)(\lambda_s\|\Delta_S^\beta\|_1 + \lambda_o\|\Delta_O^\theta\|_1) \\ &\leq 10\left(\frac{c_2}{\lambda_s} \vee \frac{c_3}{\lambda_o}\right)\lambda_o\|\Delta_O^\theta\|_1 \\ &\leq 10\left(\frac{c_2}{\lambda_s} \vee \frac{c_3}{\lambda_o}\right)\lambda_o\sqrt{o}\|\Delta^\theta\|_2. \end{aligned} \quad (19)$$

Similarly, the right hand side of (16) can be bounded by the square-root of the expression

$$3(\lambda_s/2)\|\Delta_S^\beta\|_1 + 3(\lambda_o/2)\|\Delta_O^\theta\|_1 \leq (15/4)\lambda_o\|\Delta_O^\theta\|_1 \leq (15/4)\lambda_o\sqrt{o}\|\Delta^\theta\|_2. \quad (20)$$

To ease notation, we define  $A' = 10(\frac{\varepsilon_2}{\lambda_s} \vee \frac{\varepsilon_3}{\lambda_o})\lambda_o\sqrt{o}$ ,  $B' = (15/4)\lambda_o\sqrt{o}$  and  $x' = \|\Sigma^{1/2}\Delta^\beta; \Delta^\theta\|_2$ . These notations are valid in this proof only. From (16), (19), (20), we get

$$c_1 x' \leq A' x' + \sqrt{B' x'} \implies x' \leq \frac{B'}{(c_1 - A')^2} \leq \frac{4B'}{c_1^2}$$

provided that  $2A' \leq c_1$ . Thus, we have proved the inequality

$$\|\Sigma^{1/2}\Delta^\beta\|_2 \vee \|\Delta^\theta\|_2 \leq \frac{15\lambda_o\sqrt{o}}{c_1^2},$$

which implies that

$$\gamma\|\Delta^\beta\|_1 + \|\Delta^\theta\|_1 \leq 4(\gamma\|\Delta_J^\beta\|_1 + \|\Delta_O^\theta\|_1) \leq 10\|\Delta_O^\theta\|_1 \leq 10\sqrt{o}\|\Delta_O^\theta\|_2 \leq \frac{150\lambda_o o}{c_1^2}.$$

To complete the proof, it suffices to remark that the upper bounds provided in the statement of the proposition are larger than the bounds we have just established both in case 1 and in case 2.  $\square$

## 8.2 Augmented transfer principle and incoherence imply the nearly optimal rate

**Lemma 1.** *The following bound holds:*

$$\|\mathbf{X}^{(n)}\Delta^\beta\|_2^2 \leq (\Delta^\beta)^\top (\mathbf{X}^{(n)})^\top \Delta^\theta + \|\Delta^\beta\|_1 \|\mathbf{X}^{(n)}\|^\top \xi^{(n)}\|_\infty + \lambda_s (2\|\Delta_S^\beta\|_1 - \|\Delta^\beta\|_1).$$

*Proof.* We note that

$$\hat{\beta} \in \operatorname{argmin}_{\beta} \left\{ \frac{1}{2} \left\| \mathbf{y}^{(n)} - \mathbf{X}^{(n)}\beta - \hat{\theta} \right\|_2^2 + \lambda_s \|\beta\|_1 \right\}.$$

The KKT conditions of the above minimization problem imply that, for some  $\mathbf{v} \in \mathbb{R}^p$  such that  $\|\mathbf{v}\|_\infty \leq 1$  and  $\mathbf{v}^\top \hat{\beta} = \|\hat{\beta}\|_1$ ,

$$\begin{aligned} \mathbf{0} &= (\mathbf{X}^{(n)})^\top \left( \mathbf{X}^{(n)}\hat{\beta} + \hat{\theta} - \mathbf{y}^{(n)} \right) + \lambda_s \mathbf{v} \\ &= (\mathbf{X}^{(n)})^\top \left( \mathbf{X}^{(n)}\Delta^\beta + \Delta^\theta - \xi^{(n)} \right) + \lambda_s \mathbf{v}. \end{aligned}$$

Multiplying the above equality from the left by  $(\Delta^\beta)^\top$  we obtain

$$0 = \|\mathbf{X}^{(n)}\Delta^\beta\|_2^2 + (\Delta^\beta)^\top (\mathbf{X}^{(n)})^\top \Delta^\theta - (\Delta^\beta)^\top (\mathbf{X}^{(n)})^\top \xi^{(n)} + \lambda_s (\hat{\beta} - \beta^*)^\top \mathbf{v}.$$

From the above inequality,  $\mathbf{v}^\top \hat{\beta} = \|\hat{\beta}\|_1$  and the fact that  $\mathbf{v}^\top \beta^* \leq \|\beta^*\|_1$  (since  $\|\mathbf{v}\|_\infty \leq 1$ ), we obtain that

$$\|\mathbf{X}^{(n)}\Delta^\beta\|_2^2 \leq -(\Delta^\beta)^\top (\mathbf{X}^{(n)})^\top \Delta^\theta + \|\Delta^\beta\|_1 \|\mathbf{X}^{(n)}\|^\top \xi^{(n)}\|_\infty + \lambda_s (\|\beta^*\|_1 - \|\hat{\beta}\|_1).$$

One checks that

$$\|\beta^*\|_1 - \|\hat{\beta}\|_1 \leq \|\Delta_S^\beta\|_1 - \|\Delta_{S^c}^\beta\|_1 = 2\|\Delta_S^\beta\|_1 - \|\Delta^\beta\|_1.$$

Combining this and the previous inequality we get the claim of the lemma.  $\square$

**Proposition 2.** *Let  $\Sigma$  satisfy the RE( $s, 5$ ) with constant  $\varkappa > 0$ . Let  $\mathbf{a}_1, \mathbf{a}_2, \mathbf{a}_3, \mathbf{b}_1, \mathbf{b}_2, \mathbf{c}_1, \mathbf{c}_2, \mathbf{c}_3$  and  $\gamma$  be some positive real numbers satisfying*

$$8(\mathbf{c}_2 \vee \gamma \mathbf{c}_3) \left( \frac{s}{\varkappa^2} + \frac{6.25o}{\gamma^2} \right)^{1/2} \leq \mathbf{c}_1 \quad (21)$$

$$36\mathbf{b}_2 \left( \frac{s}{\varkappa^2} + \frac{6.25o}{\gamma^2} \right)^{1/2} \leq \mathbf{c}_1^2. \quad (22)$$

Assume that on some event  $\Omega$ , the following conditions are met:

- 518 (i)  $\mathbf{X}$  satisfies the  $\text{TP}_\Sigma(\mathbf{a}_1; \mathbf{a}_2)$ .  
 519 (ii)  $\mathbf{X}$  satisfies the  $\text{IP}_\Sigma(\mathbf{b}_1; \mathbf{b}_2; \mathbf{b}_3)$ .  
 520 (iii)  $\mathbf{X}$  satisfies the  $\text{ATP}_\Sigma(\mathbf{c}_1; \mathbf{c}_2; \mathbf{c}_3)$ .  
 521 (iv)  $\lambda_s = \gamma\lambda_o \geq (2/n)\|\mathbf{X}^\top \boldsymbol{\xi}\|_\infty$ , and  $\lambda_o \geq (2/\sqrt{n})\|\boldsymbol{\xi}\|_\infty$ .

522 Then, on the same event  $\Omega$ , we have

$$\|\Sigma^{1/2}(\hat{\boldsymbol{\beta}} - \boldsymbol{\beta}^*)\|_2 \leq \frac{24\lambda_s}{c_1^2} \left( \frac{2\mathbf{a}_2}{\mathbf{a}_1} \bigvee \frac{(\mathbf{b}_1 + \mathbf{b}_3)\gamma}{\mathbf{a}_1^2} \right) \left( \frac{s}{\varkappa^2} + \frac{6.25o}{\gamma^2} \right) + \frac{5\lambda_s\sqrt{s}}{6\mathbf{a}_1^2\varkappa}.$$

523 *Proof.* Assume that we the event  $\Omega$  is realized. Condition (21) implies that the claims of Proposition 1  
 524 hold true. In particular, the Euclidean norm of the error of estimating  $\boldsymbol{\theta}^*$  can be bounded as follows:

$$\|\Delta^\theta\|_2 \leq \frac{6}{c_1^2} \left( \frac{\lambda_s^2 s}{\varkappa^2} + 6.25\lambda_o^2 o \right)^{1/2} \leq \frac{\lambda_s}{6\mathbf{b}_2}, \quad (23)$$

525 where the last inequality follows from (22). Lemma 1 and item (ii) imply that

$$\begin{aligned} \|\mathbf{X}^{(n)} \Delta^\beta\|_2^2 &\leq (\Delta^\beta)^\top (\mathbf{X}^{(n)})^\top \Delta^\theta + \|\Delta^\beta\|_1 \|(\mathbf{X}^{(n)})^\top \boldsymbol{\xi}^{(n)}\|_\infty + \lambda_s (2\|\Delta_S^\beta\|_1 - \|\Delta^\beta\|_1) \\ &\stackrel{(iv)}{\leq} (\Delta^\beta)^\top (\mathbf{X}^{(n)})^\top \Delta^\theta + \frac{\lambda_s}{2} \|\Delta^\beta\|_1 + \lambda_s (2\|\Delta_S^\beta\|_1 - \|\Delta^\beta\|_1) \\ &\stackrel{\text{IP}_\Sigma}{\leq} \mathbf{b}_1 \|\Sigma^{1/2} \Delta^\beta\|_2 \|\Delta^\theta\|_2 + \mathbf{b}_3 \|\Sigma^{1/2} \Delta^\beta\|_2 \|\Delta^\theta\|_1 + 2\lambda_s \|\Delta_S^\beta\|_1 - \frac{\lambda_s}{3} \|\Delta^\beta\|_1 \\ &\quad + \mathbf{b}_2 \|\Delta^\beta\|_1 \|\Delta^\theta\|_2 - \frac{\lambda_s}{6} \|\Delta^\beta\|_1 \\ &\leq \mathbf{b}_1 \|\Sigma^{1/2} \Delta^\beta\|_2 \|\Delta^\theta\|_2 + \mathbf{b}_3 \|\Sigma^{1/2} \Delta^\beta\|_2 \|\Delta^\theta\|_1 + (\lambda_s/3)(5\|\Delta_S^\beta\|_1 - \|\Delta_{S^c}^\beta\|_1) \end{aligned}$$

526 where the last line follows from the fact that  $2\|\Delta_S^\beta\|_1 - 1/3\|\Delta^\beta\|_1 = 1/3(5\|\Delta_S^\beta\|_1 - \|\Delta_{S^c}^\beta\|_1)$   
 527 and (23). To ease notation, let us use notations  $A = \mathbf{b}_1 \|\Delta^\theta\|_2 + \mathbf{b}_3 \|\Delta^\theta\|_1$ ,  $B = \lambda_s/3(5\|\Delta_S^\beta\|_1 -$   
 528  $\|\Delta_{S^c}^\beta\|_1)_+$  and  $x = \|\Sigma^{1/2} \Delta^\beta\|_2$ , which are valid for this proof only. On the one hand, combining  
 529 the last inequality and the  $\text{TP}_\Sigma$ , we arrive at

$$(\mathbf{a}_1 x - \mathbf{a}_2 \|\Delta^\beta\|_1)_+^2 \leq Ax + B.$$

530 This implies that either  $x \leq (\mathbf{a}_2/\mathbf{a}_1)\|\Delta^\beta\|_1$  or

$$\left( \mathbf{a}_1 x - \mathbf{a}_2 \|\Delta^\beta\|_1 - \frac{A}{2\mathbf{a}_1} \right)^2 \leq B + \frac{A^2}{4\mathbf{a}_1^2} + \frac{A\mathbf{a}_2}{\mathbf{a}_1} \|\Delta^\beta\|_1.$$

531 Therefore, in both cases,

$$x \leq \frac{\mathbf{a}_2}{\mathbf{a}_1} \|\Delta^\beta\|_1 + \frac{A}{2\mathbf{a}_1^2} + \frac{1}{\mathbf{a}_1} \left\{ B + \frac{A^2}{4\mathbf{a}_1^2} + \frac{A\mathbf{a}_2}{\mathbf{a}_1} \|\Delta^\beta\|_1 \right\}^{1/2} \leq \frac{2\mathbf{a}_2}{\mathbf{a}_1} \|\Delta^\beta\|_1 + \frac{A}{\mathbf{a}_1^2} + \frac{B^{1/2}}{\mathbf{a}_1}. \quad (24)$$

532 On the other hand, the  $\text{RE}(s, 5)$  property yields

$$B \leq \frac{5\lambda_s \|\Delta_S^\beta\|_1}{3} \leq \frac{5\lambda_s \sqrt{s} \|\Delta_S^\beta\|_2}{3} \leq \frac{5\lambda_s \sqrt{s} x}{3\varkappa} \leq \left( \frac{\mathbf{a}_1 x}{2} + \frac{5\lambda_s \sqrt{s}}{6\mathbf{a}_1 \varkappa} \right)^2. \quad (25)$$

533 Combining (24) and (25), we get

$$\frac{x}{2} \leq \frac{2\mathbf{a}_2}{\mathbf{a}_1} \|\Delta^\beta\|_1 + \frac{A}{\mathbf{a}_1^2} + \frac{5\lambda_s \sqrt{s}}{6\mathbf{a}_1^2 \varkappa}.$$

534 Replacing  $A$  and  $x$  by their expressions, we arrive at

$$\begin{aligned} \|\Sigma^{1/2} \Delta^\beta\|_2 &\leq \frac{2\mathbf{a}_2}{\mathbf{a}_1} \|\Delta^\beta\|_1 + \frac{\mathbf{b}_1 \|\Delta^\theta\|_2 + \mathbf{b}_3 \|\Delta^\theta\|_1}{\mathbf{a}_1^2} + \frac{5\lambda_s \sqrt{s}}{6\mathbf{a}_1^2 \varkappa} \\ &\leq \frac{2\mathbf{a}_2}{\mathbf{a}_1} \|\Delta^\beta\|_1 + \frac{\mathbf{b}_1 + \mathbf{b}_3}{\mathbf{a}_1^2} \|\Delta^\theta\|_1 + \frac{5\lambda_s \sqrt{s}}{6\mathbf{a}_1^2 \varkappa} \\ &\leq \left( \frac{2\mathbf{a}_2}{\gamma \mathbf{a}_1} \bigvee \frac{\mathbf{b}_1 + \mathbf{b}_3}{\mathbf{a}_1^2} \right) (\gamma \|\Delta^\beta\|_1 + \|\Delta^\theta\|_1) + \frac{5\lambda_s \sqrt{s}}{6\mathbf{a}_1^2 \varkappa}. \end{aligned}$$

Finally, combining inequality (14) from Proposition 1 with the last display we obtain

$$\|\Sigma^{1/2}\Delta^\beta\|_2 \leq \frac{24\lambda_o}{c_1^2} \left( \frac{2a_2}{\gamma a_1} \vee \frac{b_1 + b_3}{a_1^2} \right) \left( \frac{\gamma^2 s}{\varkappa^2} + 6.25o \right) + \frac{5\lambda_s \sqrt{s}}{6a_1^2 \varkappa}.$$

This completes the proof of the proposition.  $\square$

## 9 Properties of Gaussian matrices

The next lemma ensures that the parameters  $\lambda$  and  $\gamma$  satisfy, with high-probability, condition ii) of Proposition 1 (which is the same as (iv) of Proposition 2).

**Lemma 2.** *Let the rows of  $\mathbf{Z}$  be iid Gaussian with zero mean and covariance matrix  $\Sigma$  and  $\xi \sim \mathcal{N}_n(\mathbf{0}, \sigma^2 \mathbf{I}_n)$ . Then the following two claims hold true.*

(i) For any  $\delta \in (0, 1]$ , with probability at least  $1 - \delta$ ,

$$\max_{j \in [p]} \|\mathbf{Z}_{\bullet, j}^{(n)}\|_2 \leq \left\{ 1 + \sqrt{\frac{2 \log(p/\delta)}{n}} \right\} \rho(\Sigma).$$

(ii) For any  $\delta \in (0, 1]$  and  $n \geq 2 \log(3p/\delta)$ , penalization factors such that

$$\lambda_o \geq 2\sigma \sqrt{\frac{2 \log(3n/\delta)}{n}}, \quad \lambda_s \geq 2\sigma \rho(\Sigma) \sqrt{\frac{2 \log(3p/\delta)}{n}} \left( 1 + \sqrt{\frac{2 \log(3p/\delta)}{n}} \right),$$

satisfy conditions of item (iv) of Proposition 2 with probability at least  $1 - \delta$ .

*Proof.* Let  $\tilde{\mathbf{Z}} := \mathbf{Z}\Sigma^{-1/2}$ . We also note that

$$\|\mathbf{Z}_{\bullet, j}\|_2^2 = \sum_{i \in [n]} \left[ \tilde{\mathbf{Z}}_{i, \bullet} (\Sigma^{1/2})_{\bullet, j} \right]^2,$$

where  $\tilde{\mathbf{Z}}_{1, \bullet} (\Sigma^{1/2})_{\bullet, j}, \dots, \tilde{\mathbf{Z}}_{n, \bullet} (\Sigma^{1/2})_{\bullet, j}$  are iid  $\mathcal{N}(0, \Sigma_{jj})$ . By standard  $\chi^2$  concentration inequalities, for all  $j \in [p]$ , with probability at least  $1 - \delta/p$ ,

$$\|\mathbf{Z}_{\bullet, j}^{(n)}\|_2 \leq \Sigma_{jj}^{1/2} \left\{ 1 + \sqrt{\frac{2 \log(p/\delta)}{n}} \right\}.$$

Item (i) follows from this inequality using the union bound.

We now prove item (ii). Recall that  $\mathbf{Z}$  and  $\xi \sim \mathcal{N}_n(0, \sigma^2 \mathbf{I}_n)$  are independent and, therefore, conditionally on  $\mathbf{Z}$ ,  $(\mathbf{Z}_{\bullet, j})^\top \xi \sim \mathcal{N}_n(0, \sigma^2 \|\mathbf{Z}_{\bullet, j}\|_2^2)$ . The well known maximal Gaussian concentration inequality implies that for all  $j \in [p]$ , with probability at least  $1 - \delta/3p$ ,

$$|(\mathbf{Z}_{\bullet, j}^{(n)})^\top \xi^{(n)}| \leq \sigma \|\mathbf{Z}_{\bullet, j}^{(n)}\| \sqrt{\frac{2 \log(3p/\delta)}{n}}. \quad (26)$$

Similarly, with probability at least  $1 - \delta/3$ ,

$$\|\xi^{(n)}\|_\infty \leq \sigma \sqrt{\frac{2 \log(3n/\delta)}{n}}. \quad (27)$$

Taking the union bound over the  $p$  sets satisfying (26), the set satisfying (27) and the set satisfying item (i), we prove item (ii).  $\square$

### 9.1 Bounding extrema on compact sets

In what follows, we will use the notion of Gaussian width for measuring the richness of a set of vectors. For a compact set  $\mathcal{B} \subset \mathbb{R}^p$ , we define the Gaussian width of  $\mathcal{B}$  by

$$\mathcal{G}(\mathcal{B}) := \mathbb{E} \left[ \sup_{\mathbf{b} \in \mathcal{B}} \mathbf{b}^\top \xi \right], \quad \xi_i \stackrel{\text{iid}}{\sim} \mathcal{N}(0, 1).$$

558 In view of (Boucheron et al., 2013, Theorem 2.5), for every symmetric  $p \times p$  matrix  $\mathbf{A}$ ,  $\mathbb{E}[\|\mathbf{A}\xi\|_\infty] \leq$   
 559  $\{\max_{j \in [p]} (\mathbf{A}^2)_{jj}^{1/2}\} \sqrt{2 \log p}$ . This implies that

$$\mathcal{G}(\mathbf{A}\mathbb{B}_1^p) = \mathbb{E}[\|\mathbf{A}\xi\|_\infty] \leq \rho(\mathbf{A}^2) \sqrt{2 \log p}. \quad (28)$$

560 The above inequality is tight for orthogonal matrices  $\mathbf{A}$ , but it might be sub-optimal, up to a log  
 561 factor, especially for poorly conditioned matrices  $\mathbf{A}$ .

**Lemma 3.** *Let  $\mathbf{Z}$  be a  $n \times p$  matrix with iid  $\mathcal{N}(0, 1)$  entries. For all  $n \geq 1$ ,  $t > 0$  and any compact set  $\mathcal{B} \subset \mathbb{S}^{p-1}$ , with probability at least  $1 - \exp(-t^2/2)$ ,*

$$\inf_{\mathbf{b} \in \mathcal{B}} \|\mathbf{Z}\mathbf{b}\|_2 \geq \frac{n}{\sqrt{n+1}} - \mathcal{G}(\mathcal{B}) - t.$$

*As a consequence, for all  $n \geq 1$  and  $\delta \in (0, 1]$ , with probability at least  $1 - \delta$ , the following inequality holds:*

$$\inf_{\mathbf{b} \in \mathcal{B}} \|\mathbf{Z}^{(n)}\mathbf{b}\|_2 \geq 1 - \frac{1}{2n} - \sqrt{\frac{2 \log(1/\delta)}{n}} - \frac{\mathcal{G}(\mathcal{B})}{\sqrt{n}}.$$

562 *Proof.* The norm of  $\mathbf{Z}\mathbf{b}$  can be written as

$$\|\mathbf{Z}\mathbf{b}\|_2 = \sup_{\mathbf{v} \in \mathbb{B}_2^n} \mathbf{v}^\top \mathbf{Z}\mathbf{b}.$$

563 We define the centered Gaussian process  $Z_{\mathbf{b}, \mathbf{v}} = -\mathbf{v}^\top \mathbf{Z}\mathbf{b} = -\sum_{i=1}^n \mathbf{Z}_i \mathbf{b} \mathbf{v}_i$ . It satisfies

$$\mathbb{E}[(Z_{\mathbf{b}, \mathbf{v}} - Z_{\mathbf{b}', \mathbf{v}'})^2] = \|\mathbf{b}\mathbf{v}^\top - \mathbf{b}'(\mathbf{v}')^\top\|_F^2.$$

We are interested in upper bounding the quantity  $\inf_{\mathbf{v}} \sup_{\mathbf{b}} Z_{\mathbf{b}, \mathbf{v}}$ . To this end, we define the process

$$W_{\mathbf{b}, \mathbf{v}} = \text{trace}[\mathbf{v}^\top \boldsymbol{\xi}] + \text{trace}[\mathbf{b}^\top \bar{\boldsymbol{\xi}}],$$

564 where  $\boldsymbol{\xi} \in \mathbb{R}^n$  and  $\bar{\boldsymbol{\xi}} \in \mathbb{R}^p$  are two independent vectors with iid  $\mathcal{N}(0, 1)$  entries. One checks that

$$\begin{aligned} \mathbb{E}[(Z_{\mathbf{b}, \mathbf{v}} - Z_{\mathbf{b}', \mathbf{v}'})^2] - \mathbb{E}[(W_{\mathbf{b}, \mathbf{v}} - W_{\mathbf{b}', \mathbf{v}'})^2] &= \|\mathbf{b}\mathbf{v}^\top - \mathbf{b}'(\mathbf{v}')^\top\|_F^2 - \|\mathbf{v} - \mathbf{v}'\|_F^2 - \|\mathbf{b} - \mathbf{b}'\|_F^2 \\ &= -2(1 - \mathbf{v}^\top \mathbf{v}')(1 - \mathbf{b}^\top \mathbf{b}') \leq 0. \end{aligned}$$

565 Using Gordon's inequality, we get

$$\mathbb{E}[\inf_{\mathbf{v}} \sup_{\mathbf{b}} Z_{\mathbf{b}, \mathbf{v}}] \leq \mathbb{E}[\inf_{\mathbf{v}} \sup_{\mathbf{b}} W_{\mathbf{b}, \mathbf{v}}] = \mathcal{G}(\mathcal{B}) - \mathbb{E}[\|\boldsymbol{\xi}\|_2] \leq \mathcal{G}(\mathcal{B}) - \frac{n}{\sqrt{n+1}}.$$

566 To complete the proof of the first statement, it suffices to note that the mapping  $\mathbf{Z} \mapsto \inf_{\mathbf{b} \in \mathcal{B}} \|\mathbf{Z}\mathbf{b}\|_2$   
 567 is Lipschitz with constant 1, and to apply the Gaussian concentration inequality (Boucheron et al.,  
 568 2013, Theorem 5.6). Scaling the obtained bound by  $1/\sqrt{n}$ , the proof of the inequality in the second  
 569 statement is immediate after we use the simple bound  $(n/(n+1))^{1/2} \geq 1 - 1/(2n)$ .  $\square$

**Lemma 4.** *Let  $\mathbf{Z}$  be a  $n \times p$  matrix with iid  $\mathcal{N}(0, 1)$  entries. Let  $V$  be any compact subset of  $\mathbb{S}^{p-1} \times \mathbb{S}^{n-1}$  and define  $V_1 = \{\mathbf{v} : \exists \mathbf{u} \text{ s.t. } (\mathbf{v}, \mathbf{u}) \in V\}$  and  $V_2 = \{\mathbf{u} : \exists \mathbf{v} \text{ s.t. } (\mathbf{v}, \mathbf{u}) \in V\}$ . Then for any  $n \geq 1$  and  $t > 0$ , with probability at least  $1 - \exp(-t^2/2)$ , we have*

$$\sup_{[\mathbf{v}, \mathbf{u}] \in V} \mathbf{u}^\top \mathbf{Z}\mathbf{v} \leq \mathcal{G}(V_1) + \mathcal{G}(V_2) + t.$$

570 *Proof.* For each  $(\mathbf{v}, \mathbf{u}) \in V$ , we define

$$Z_{\mathbf{v}, \mathbf{u}} := \mathbf{u}^\top \mathbf{Z}\mathbf{v}, \quad W_{\mathbf{v}, \mathbf{u}} := \mathbf{v}^\top \boldsymbol{\xi} + \mathbf{u}^\top \bar{\boldsymbol{\xi}},$$

571 where  $\boldsymbol{\xi}$  and  $\bar{\boldsymbol{\xi}}$  are two independent standard Gaussian vectors. Therefore,  $(\mathbf{v}, \mathbf{u}) \mapsto Z_{\mathbf{v}, \mathbf{u}}$  and  
 572  $(\mathbf{v}, \mathbf{u}) \mapsto W_{\mathbf{v}, \mathbf{u}}$  define centered continuous Gaussian processes  $Z$  and  $W$  indexed by  $V$ .

573 To compute the variance of the increments of  $W$ . We remark that

$$Z_{\mathbf{v}, \mathbf{u}} - Z_{\mathbf{v}', \mathbf{u}'} = \text{trace}[\mathbf{Z}(\mathbf{v}\mathbf{u}^\top - \mathbf{v}'(\mathbf{u}')^\top)] \sim \mathcal{N}(0, \|\mathbf{v}\mathbf{u}^\top - \mathbf{v}'(\mathbf{u}')^\top\|_F^2).$$

574 Hence,

$$\begin{aligned}\mathbb{E}[(Z_{\mathbf{v},\mathbf{u}} - Z_{\mathbf{v}',\mathbf{u}'})^2] &= \|\mathbf{v}\mathbf{u}^\top - \mathbf{v}'(\mathbf{u}')^\top\|_F^2 = \|(\mathbf{v} - \mathbf{v}')\mathbf{u}^\top + \mathbf{v}'(\mathbf{u} - \mathbf{u}')^\top\|_F^2 \\ &\leq \|\mathbf{v} - \mathbf{v}'\|_2^2 + \|\mathbf{u} - \mathbf{u}'\|_2^2,\end{aligned}\quad (29)$$

575 using Cauchy-Schwarz's inequality and the facts that  $\mathbf{v}, \mathbf{v}' \in \mathbb{S}^{p-1}$  and  $\mathbf{u}, \mathbf{u}' \in \mathbb{S}^{n-1}$ . On the other  
576 hand, the definition of the process  $Z$  yields

$$\mathbb{E}[(W_{\mathbf{v},\mathbf{u}} - W_{\mathbf{v}',\mathbf{u}'})^2] = \|\mathbf{v} - \mathbf{v}'\|_2^2 + \|\mathbf{u} - \mathbf{u}'\|_2^2. \quad (30)$$

577 From (29),(30), we conclude that the centered Gaussian processes  $W$  and  $Z$  satisfy the conditions  
578 of Gordon's inequality. Hence, using the notation  $V_1 = \{\mathbf{v} : \exists \mathbf{u} \text{ s.t. } (\mathbf{v}, \mathbf{u}) \in V\}$  and  $V_2 = \{\mathbf{u} : \exists \mathbf{v} \text{ s.t. } (\mathbf{v}, \mathbf{u}) \in V\}$ , we get

$$\mathbb{E}\left[\sup_{[\mathbf{v},\mathbf{u}] \in V} Z_{\mathbf{v},\mathbf{u}}\right] \leq \mathbb{E}\left[\sup_{[\mathbf{v},\mathbf{u}] \in V} W_{\mathbf{v},\mathbf{u}}\right] \leq \mathbb{E}\left[\sup_{\mathbf{v} \in V_1} \mathbf{v}^\top \boldsymbol{\xi}\right] + \mathbb{E}\left[\sup_{\mathbf{u} \in V_2} \mathbf{u}^\top \bar{\boldsymbol{\xi}}\right] = \mathcal{G}(V_1) + \mathcal{G}(V_2).$$

580 Moreover,  $\mathbf{Z} \mapsto \sup_{[\mathbf{v},\mathbf{u}] \in V_1 \times V_2} \mathbf{u}^\top \mathbf{Z} \mathbf{v}$  is Lipschitz continuous with constant 1, so the Gaussian  
581 concentration inequality holds (Boucheron et al., 2013, Theorem 5.6). This and the previous inequality  
582 bounding the mean complete the proof.  $\square$

## 583 9.2 Removing compactness constraints: peeling techniques

584 **Lemma 5** (Single-parameter peeling). *Let  $g : \mathbb{R}_+ \rightarrow \mathbb{R}_+$  be a right-continuous non-decreasing*  
585 *function and  $h : V \rightarrow \mathbb{R}_+$ . Assume that for some constants  $b \in \mathbb{R}_+$  and  $c \geq 1$ , for every  $r > 0$  and*  
586 *for any  $\delta \in (0, 1/(7 \vee c))$ , we have*

$$A(r, \delta) = \left\{ \inf_{\mathbf{v} \in V: h(\mathbf{v}) \leq r} M(\mathbf{v}) \geq -g(r) - b\sqrt{\log(1/\delta)} \right\},$$

587 with probability at least  $1 - c\delta$ . Then, with probability at least  $1 - c\delta$ , we have

$$\forall \mathbf{v} \in V \quad M(\mathbf{v}) \geq -1.2(g \circ h)(\mathbf{v}) - (3 + \sqrt{\log(9/\delta)})b.$$

*Proof.* Throughout the proof, without loss of generality, we assume  $b = 1$ . Let  $\eta, \epsilon > 1$  be two  
parameters to be chosen later on. We set<sup>5</sup>  $\mu_0 = 0$ ,  $\mu_k = \mu\eta^{k-1}$ ,  $\nu_k = g^{-1}(\mu_k)$  and  $V_k = \{\mathbf{v} \in V : \mu_k \leq (g \circ h)(\mathbf{v}) < \mu_{k+1}\}$ , for  $k \geq 1$ . The union bound and the fact that  $\sum_{k \geq 1} k^{-1-\epsilon} \leq 1 + \epsilon^{-1}$   
imply that the event

$$A := \bigcap_{k=1}^{\infty} A(\nu_k, \epsilon\delta/((1+\epsilon)k^{1+\epsilon}))$$

588 has a probability at least  $1 - c\delta$ . We assume in the sequel that this event is realized, that is

$$\forall k \in \mathbb{N}^* \quad \left\{ \forall \mathbf{v} \in V \text{ such that } h(\mathbf{v}) \leq \nu_k \text{ we have } M(\mathbf{v}) \geq -g(\nu_k) - \sqrt{\log\{(1+\epsilon)/(\epsilon\delta)\}} + (1+\epsilon)\log k, \right\}. \quad (31)$$

589 For every  $\mathbf{v} \in V$ , there is  $\ell \in \mathbb{N}$  such that  $\mathbf{v} \in V_\ell$ . If  $\ell \geq 1$ , then  $h(\mathbf{v}) \leq \nu_{\ell+1}$  and (31) implies that

$$\begin{aligned}M(\mathbf{v}) &\geq -g(\nu_{\ell+1}) - \sqrt{\log\{(1+\epsilon)/(\epsilon\delta)\}} + (1+\epsilon)\log(\ell+1) \\ &= -\mu_{\ell+1} - \sqrt{\log\{(1+\epsilon)/(\epsilon\delta)\}} + (1+\epsilon)\log(\ell+1) \\ &= -\eta\mu_\ell - \sqrt{\log\{(1+\epsilon)/(\epsilon\delta)\}} + (1+\epsilon)\log(\ell+1) \\ &\geq -\eta^2(g \circ h)(\mathbf{v}) + (\eta-1)\mu\eta^\ell - \sqrt{\log\{(1+\epsilon)/(\epsilon\delta)\}} + (1+\epsilon)\log(\ell+1).\end{aligned}\quad (32)$$

590 If  $\ell = 0$ , then (31) with  $k = 1$  leads to

$$\begin{aligned}M(\mathbf{v}) &\geq -g(\nu_1) - \sqrt{\log\{(1+\epsilon)/(\epsilon\delta)\}} \\ &= -g(g^{-1}(\mu)) - \sqrt{\log\{(1+\epsilon)/(\epsilon\delta)\}} \\ &= -\mu - \sqrt{\log\{(1+\epsilon)/(\epsilon\delta)\}}.\end{aligned}\quad (33)$$

<sup>5</sup>Here  $g^{-1}$  is the generalized inverse defined by  $g^{-1}(x) = \inf\{a \in \mathbb{R}_+ : g(a) \geq x\}$ .

From (32) one can infer that, for  $\ell \geq 1$ ,

$$M(\mathbf{v}) \geq -\eta^2(g \circ h)(\mathbf{v}) - \sqrt{\log\{(1+\epsilon)/(\epsilon\delta)\}} \\ + \eta^\ell \left( (\eta-1)\mu - \sup_{z \geq 1} \frac{\sqrt{\log\{(1+\epsilon)/(\epsilon\delta)\}} + (1+\epsilon)\log(z+1) - \sqrt{\log\{(1+\epsilon)/(\epsilon\delta)\}}}{\eta^z} \right).$$

We choose  $\mu$  so that the last term vanishes, that is

$$(\eta-1)\mu = \sup_{z \geq 1} \frac{\sqrt{\log\{(1+\epsilon)/(\epsilon\delta)\}} + (1+\epsilon)\log(z+1) - \sqrt{\log\{(1+\epsilon)/(\epsilon\delta)\}}}{\eta^z} \\ = \sup_{z \geq 1} \frac{(1+\epsilon)\eta^{-z}\log(z+1)}{\sqrt{\log\{(1+\epsilon)/(\epsilon\delta)\}} + (1+\epsilon)\log(z+1) + \sqrt{\log\{(1+\epsilon)/(\epsilon\delta)\}}}.$$

To compute the last expression, we choose  $\eta^2 = 1.2$  and  $\epsilon = 1/8$ . This yields

$$\mu = (\eta-1)^{-1} \sup_{z \geq 1} \frac{(9/8)(1.2)^{-z/2}\log(z+1)}{\sqrt{\log(9/\delta)} + (9/8)\log(z+1) + \sqrt{\log(9/\delta)}} \\ \leq (\eta-1)^{-1} \sup_{z \geq 1} \frac{(9/8)(1.2)^{-z/2}\log(z+1)}{\sqrt{\log 36} + (9/8)\log(z+1) + \sqrt{\log 36}} \leq 3.$$

Combining with (33), this yields

$$M(\mathbf{v}) \geq -\mu - 1.2(g \circ h)(\mathbf{v}) - \sqrt{\log(9/\delta)} \\ \geq -1.2(g \circ h)(\mathbf{v}) - (3 + \sqrt{\log(9/\delta)}).$$

This completes the proof.  $\square$

**Lemma 6 (Bi-parameter peeling).** *Let  $g, \bar{g}$  be right-continuous, non-decreasing functions from  $\mathbb{R}_+$  to  $\mathbb{R}_+$  and  $h, \bar{h}$  be functions from  $V$  to  $\mathbb{R}_+$ . Assume that for some constants  $b \in \mathbb{R}_+$  and  $c \geq 1$ , for every  $r, \bar{r} > 0$  and for any  $\delta \in (0, 1/(c \vee 7))$ , we have*

$$A(r, \bar{r}, \delta) = \left\{ \mathbf{v} \in V : \inf_{(h, \bar{h})(\mathbf{v}) \leq (r, \bar{r})} M(\mathbf{v}) \geq -g(r) - \bar{g}(\bar{r}) - b\sqrt{\log(1/\delta)} \right\},$$

with probability at least  $1 - c\delta$ . Then, with probability at least  $1 - c\delta$ , we have

$$\forall \mathbf{v} \in V \quad M(\mathbf{v}) \geq -1.2(g \circ h)(\mathbf{v}) - 1.2(\bar{g} \circ \bar{h})(\mathbf{v}) - b(4.8 + \sqrt{\log(81/\delta)}).$$

*Proof.* We will repeat the same steps as for the one-parameter peeling. W.l.o.g. we assume  $b = 1$ . We choose  $\mu > 0, \eta > 1$  and  $\epsilon > 0$ . Define  $\mu_0 = 0, \mu_k = \mu\eta^{k-1}, \nu_k = g^{-1}(\mu_k), \bar{\nu}_k = \bar{g}^{-1}(\mu_k)$  and  $V_{k, \bar{k}} = \{\mathbf{v} \in V : \mu_k \leq (g \circ h)(\mathbf{v}) < \mu_{k+1}, \bar{\mu}_k \leq (\bar{g} \circ \bar{h})(\mathbf{v}) < \bar{\mu}_{k+1}\}$ . The union bound implies that the event

$$A = \bigcap_{k=1}^{\infty} A\left(\nu_k, \bar{\nu}_k, \frac{\epsilon^2 \delta}{(1+\epsilon)^2(k\bar{k})^{1+\epsilon}}\right)$$

has a probability at least  $1 - c\delta$ . To ease notation, set  $\delta_\epsilon = \epsilon^2 \delta / (1+\epsilon)^2$ . We assume in the sequel that the event  $A$  is realized, that is

$$\forall k, \bar{k} \in \mathbb{N}^*, \forall \mathbf{v} \in V \text{ such that } (h, \bar{h})(\mathbf{v}) \leq (\nu_k, \bar{\nu}_{\bar{k}}) \text{ we have}$$

$$M(\mathbf{v}) \geq -g(\nu_k) - \bar{g}(\bar{\nu}_{\bar{k}}) - \sqrt{\log(1/\delta_\epsilon) + (1+\epsilon)\log(k\bar{k})}. \quad (34)$$

For every  $\mathbf{v} \in V$ , there is a pair  $(\ell, \bar{\ell}) \in \mathbb{N}^2$  such that  $\mathbf{v} \in V_\ell$ . If  $\ell \wedge \bar{\ell} \geq 1$ , then  $(h, \bar{h})(\mathbf{v}) \leq (\nu_{\ell+1}, \bar{\nu}_{\bar{\ell}+1})$ , and (34) implies that

$$M(\mathbf{v}) \geq -g(\nu_{\ell+1}) - \bar{g}(\bar{\nu}_{\bar{\ell}+1}) - \sqrt{\log(1/\delta_\epsilon) + (1+\epsilon)\log(\ell+1)(\bar{\ell}+1)} \\ = -\mu_{\ell+1} - \bar{\mu}_{\bar{\ell}+1} - \sqrt{\log(1/\delta_\epsilon) + (1+\epsilon)\log(\ell+1)(\bar{\ell}+1)} \\ = -\eta\mu_\ell - \eta\bar{\mu}_{\bar{\ell}} - \sqrt{\log(1/\delta_\epsilon) + (1+\epsilon)\log(\ell+1)(\bar{\ell}+1)}.$$

<sup>6</sup>Here  $g^{-1}$  is the generalized inverse given by  $g^{-1}(x) = \inf\{a \in \mathbb{R}_+ : g(a) \geq x\}$ .

604 From this inequality, we infer that

$$\begin{aligned}
M(\mathbf{v}) &\geq -\eta^2[(g \circ h)(\mathbf{v}) + (\bar{g} \circ \bar{h})(\mathbf{v})] \\
&\quad + \eta(\eta - 1)(\mu_\ell + \mu_{\bar{\ell}}) - \sqrt{\log(1/\delta_\epsilon) + (1 + \epsilon) \log(\ell + 1)(\bar{\ell} + 1)} \\
&= -\eta^2(g \circ h)(\mathbf{v}) - \eta^2(\bar{g} \circ \bar{h})(\mathbf{v}) - \sqrt{\log(1/\delta_\epsilon)} \\
&\quad + \left\{ (\eta - 1)\mu(\eta^\ell + \eta^{\bar{\ell}}) + \sqrt{\log(1/\delta_\epsilon)} - \sqrt{\log(1/\delta_\epsilon) + (1 + \epsilon) \log(\ell + 1)(\bar{\ell} + 1)} \right\}.
\end{aligned}$$

605 We choose  $\mu$  so that the expression inside the braces is nonnegative, that is

$$(\eta - 1)\mu = \sup_{z, \bar{z} \geq 1} \frac{\sqrt{\log(1/\delta_\epsilon) + (1 + \epsilon) \log(1 + z) + (1 + \epsilon) \log(1 + \bar{z})} - \sqrt{\log(1/\delta_\epsilon)}}{\eta^z + \eta^{\bar{z}}}.$$

606 Setting  $\epsilon = 1/8$ ,  $\eta^2 = 1.2$  and using that  $\delta \leq 1/7$ , we get that  $\delta_\epsilon \leq 1/567$  and hence

$$\mu \leq (\eta - 1)^{-1} \sup_{z, \bar{z} \geq 1} \frac{\sqrt{\log 567 + (9/8) \log(1 + z) + (9/8) \log(1 + \bar{z})} - \sqrt{\log 567}}{1.2^{z/2} + 1.2^{\bar{z}/2}} \leq 2.4$$

607 Combining with the case  $\ell \wedge \bar{\ell} = 1$ , this yields

$$\begin{aligned}
M(\mathbf{v}) &\geq -2\mu - 1.2(g \circ h)(\mathbf{v}) - 1.2(\bar{g} \circ \bar{h})(\mathbf{v}) - \sqrt{\log(81/\delta)} \\
&\geq -1.2(g \circ h)(\mathbf{v}) - 1.2(\bar{g} \circ \bar{h})(\mathbf{v}) - 4.8 - \sqrt{\log(81/\delta)}.
\end{aligned}$$

608 This completes the proof.  $\square$

### 609 9.3 Structural properties of Gaussian designs

610 **Proposition 3.** Let  $\mathbf{Z}$  be a  $n \times p$  matrix with iid  $\mathcal{N}_p(0, \Sigma)$  columns. For all  $n \geq 100$  and  $\delta \in (0, 1/7]$ ,  
611 with probability at least  $1 - \delta$ , the following inequality holds: for all  $\mathbf{v} \in \mathbb{R}^p$ ,

$$\|\mathbf{Z}^{(n)}\mathbf{v}\|_2 \geq \left(1 - \frac{4.3 + \sqrt{2 \log(9/\delta)}}{\sqrt{n}}\right) \|\Sigma^{1/2}\mathbf{v}\|_2 - \frac{1.2\mathcal{G}(\Sigma^{1/2}\mathbb{B}_1^p)}{\sqrt{n}} \|\mathbf{v}\|_1. \quad (35)$$

612 **Remark 1.** The above result is similar to (Raskutti et al., 2010, Theorem 1), but it has three  
613 advantages. First, the influence of the failure probability  $\delta$  on the constants is made explicit. Second,  
614 the factor  $\rho(\Sigma)$  appearing in the last term is replaced by the smaller quantity  $\mathcal{G}(\Sigma^{1/2}\mathbb{B}_1^p)$ . Third, we  
615 improved the constants.

616 Proposition 3 is a useful technical tool that allows one to transfer the restricted eigenvalue property  
617 from the population covariance matrix to the empirical one. Following Oliveira (2013) we refer to  
618 (35) as the transfer principle.

*Proof of Proposition 3.* Let  $r > 0$ . We define the sets

$$V_\Sigma(r) := \{\mathbf{v} \in \mathbb{R}^p : \|\Sigma^{1/2}\mathbf{v}\|_2 = 1, \|\mathbf{v}\|_1 \leq r\},$$

619 and  $\mathcal{B} := \{\Sigma^{1/2}\mathbf{v} : \mathbf{v} \in V_\Sigma(r)\}$ . Note that, if  $\xi \sim \mathcal{N}_p(0, \mathbf{I}_p)$ ,

$$\mathcal{G}(\mathcal{B}) \leq \mathbb{E} \left[ \sup_{\mathbf{v} \in r\mathbb{B}_1^p} \xi^\top \Sigma^{1/2}\mathbf{v} \right] \leq r\mathcal{G}(\Sigma^{1/2}\mathbb{B}_1^p). \quad (36)$$

Let  $\tilde{\mathbf{Z}}$  be a  $n \times p$  matrix with iid  $\mathcal{N}(0, 1)$  entries such that  $\mathbf{Z} = \tilde{\mathbf{Z}}\Sigma^{1/2}$ . Clearly,

$$\inf_{\mathbf{v} \in V_\Sigma(r)} \|\mathbf{Z}^{(n)}\mathbf{v}\|_2 = \inf_{\mathbf{b} \in \mathcal{B}} \|\tilde{\mathbf{Z}}^{(n)}\mathbf{b}\|_2.$$

The above equality, (36) and Lemma 4 (noting that  $\mathcal{B} \subset \mathbb{S}^{p-1}$ ) entails that, for all  $r > 0$  and  $\delta \in (0, 1]$ , with probability at least  $1 - \delta$ , the following inequality holds:

$$\inf_{\mathbf{v} \in V_\Sigma(r)} \|\mathbf{Z}^{(n)}\mathbf{v}\|_2 \geq 1 - \frac{1}{2n} - \sqrt{\frac{2 \log(1/\delta)}{n}} - \frac{\mathcal{G}(\Sigma^{1/2}\mathbb{B}_1^p)}{\sqrt{n}} r.$$

We will now use the above property and Lemma 5 with constraint set  $V := \{\mathbf{v} \in \mathbb{R}^p : \|\Sigma^{1/2}\mathbf{v}\|_2 = 1\}$ ,

$$M(\mathbf{v}) := \|\mathbf{Z}^{(n)}\mathbf{v}\|_2 - 1 + \frac{1}{2n},$$

functions  $h(\mathbf{v}) := \|\mathbf{v}\|_1$ ,  $g(r) := \frac{\mathcal{G}(\Sigma^{1/2}\mathbb{B}_1^p)}{\sqrt{n}}r$ , and constants  $c := 1$  and  $b := \sqrt{2/n}$ . Lemma 5 implies that with probability at least  $1 - \delta$ , for all  $\mathbf{v}$  such that  $\|\Sigma^{1/2}\mathbf{v}\|_2 = 1$ , we have

$$M(\mathbf{v}) = \|\mathbf{Z}^{(n)}\mathbf{v}\|_2 - 1 + \frac{1}{2n} \geq -1.2 \frac{\mathcal{G}(\Sigma^{1/2}\mathbb{B}_1^p)}{\sqrt{n}} \|\mathbf{v}\|_1 - \frac{3\sqrt{2} + \sqrt{2\log(9/\delta)}}{\sqrt{n}}.$$

Replacing  $\mathbf{v}$  by  $\mathbf{u}/\|\Sigma^{1/2}\mathbf{u}\|_2$ , for an arbitrary  $\mathbf{u} \in \mathbb{R}^p$ , we get

$$\|\mathbf{Z}^{(n)}\mathbf{u}\|_2 \geq \left(1 - \frac{1}{2n} - \frac{3\sqrt{2} + \sqrt{2\log(9/\delta)}}{\sqrt{n}}\right) \|\Sigma^{1/2}\mathbf{u}\| - 1.2 \frac{\mathcal{G}(\Sigma^{1/2}\mathbb{B}_1^p)}{\sqrt{n}} \|\mathbf{u}\|_1.$$

To complete the proof, it suffices to note that  $(1/2\sqrt{n}) + 3\sqrt{2} \leq 4.3$  for  $n \geq 100$ .  $\square$

**Proposition 4.** Let  $\mathbf{Z} \in \mathbb{R}^{n \times p}$  be a random matrix with i.i.d.  $\mathcal{N}_p(0, \Sigma)$  rows. For all  $\delta \in (0, 1]$  and  $n \in \mathbb{N}$ , with probability at least  $1 - \delta$ , the following property holds: for all  $[\mathbf{v}; \mathbf{u}] \in \mathbb{R}^{p+n}$ ,

$$\begin{aligned} |\mathbf{u}^\top \mathbf{Z}^{(n)} \mathbf{v}| &\leq \|\Sigma^{1/2}\mathbf{v}\|_2 \|\mathbf{u}\|_2 \sqrt{\frac{2}{n}} \left(4.8 + \sqrt{\log(81/\delta)}\right) \\ &\quad + 1.2 \|\mathbf{v}\|_1 \|\mathbf{u}\|_2 \frac{\mathcal{G}(\Sigma^{1/2}\mathbb{B}_1^p)}{\sqrt{n}} + 1.2 \|\Sigma^{1/2}\mathbf{v}\|_2 \frac{\mathcal{G}(\|\mathbf{u}\|_1 \mathbb{B}_1^n \cap \|\mathbf{u}\|_2 \mathbb{B}_2^n)}{\sqrt{n}}. \end{aligned}$$

**Remark 2.** If, instead of Proposition 4, well-known upper bounds on the maximal singular value of a Gaussian matrix, we get a sub-optimal result. Indeed, upper tail bounds on largest singular value imply that, with high-probability, for all  $\mathbf{v}$  and  $\mathbf{u}$ ,

$$|\mathbf{u}^\top \mathbf{Z}^{(n)} \mathbf{v}| \leq \|\Sigma^{1/2}\mathbf{v}\|_2 \|\mathbf{u}\|_2 \|\mathbf{Z}^{(n)} \Sigma^{-1/2}\|_{op} \lesssim \|\Sigma^{1/2}\mathbf{v}\|_2 \|\mathbf{u}\|_2 \sqrt{\frac{p}{n}}.$$

In case  $\mathbf{v}$  and  $\mathbf{u}$  are sparse, the previous lemma establishes a much sharp upper bound with respect to dimension. One may see Proposition 4 also as generalized control on the ‘‘incoherence’’ between the column-space of  $\mathbf{Z}^{(n)}$  and the identity  $\mathbf{I}_n$ . This is particularly useful when the vectors are sparse as in our setting. Alongside Proposition 3, Proposition 4 is at the core of our methodology to obtain improved near-optimal rates for corrupted sparse linear regression.

*Proof.* Let  $r_1, r_2 > 0$  and define the sets

$$\begin{aligned} V_{\Sigma,1}(r_1) &:= \{\mathbf{v} \in \mathbb{R}^p : \|\Sigma^{1/2}\mathbf{v}\|_2 = 1, \|\mathbf{v}\|_1 \leq r_1\}, \\ V_2(r_2) &:= \{\mathbf{u} \in \mathbb{R}^n : \|\mathbf{u}\|_2 = 1, \|\mathbf{u}\|_1 \leq r_2\}. \end{aligned}$$

We also define the set  $\mathcal{B}_1 := \{\Sigma^{1/2}\mathbf{v} : \mathbf{v} \in V_{\Sigma,1}(r_1)\}$ . By similar arguments used to establish (36), we have the following Gaussian width bounds:

$$\mathcal{G}(\mathcal{B}_1) \leq r_1 \mathcal{G}(\Sigma^{1/2}\mathbb{B}_1^p), \quad \mathcal{G}(V_2(r_2)) \leq r_2 \mathcal{G}(\mathbb{B}_1^n \cap \mathbb{B}_2^n / r_2). \quad (37)$$

Let  $\tilde{\mathbf{Z}}$  be a  $n \times p$  matrix with iid  $\mathcal{N}(0, 1)$  entries such that  $\mathbf{Z} = \tilde{\mathbf{Z}}\Sigma^{1/2}$ . Clearly,

$$\sup_{[\mathbf{v}; \mathbf{u}] \in V_{\Sigma,1}(r_1) \times V_2(r_2)} |\mathbf{u}^\top \mathbf{Z}^{(n)} \mathbf{v}| = \sup_{[\mathbf{v}'; \mathbf{u}] \in \mathcal{B}_1 \times V_2(r_2)} |\mathbf{u}^\top \tilde{\mathbf{Z}}^{(n)} \mathbf{v}'|.$$

The above equality, (37) and Lemma 4 (noting that  $\mathcal{B}_1 \subset \mathbb{S}^{p-1}$  and  $V_2(r_2) \subset \mathbb{S}^{n-1}$ ) entail that, for any  $r_1, r_2 > 0$  and  $\delta \in (0, 1]$ , with probability at least  $1 - \delta$ , the following inequality holds:

$$\sup_{[\mathbf{v}; \mathbf{u}] \in V_{\Sigma,1}(r_1) \times V_2(r_2)} |\mathbf{u}^\top \mathbf{Z}^{(n)} \mathbf{v}| \leq \frac{\mathcal{G}(\Sigma^{1/2}\mathbb{B}_1^p)}{\sqrt{n}} r_1 + \frac{\mathcal{G}(\mathbb{B}_1^n \cap \mathbb{B}_2^n / r_2)}{\sqrt{n}} r_2 + \sqrt{\frac{2\log(1/\delta)}{n}}.$$

We use the above property and Lemma 6 with constraint sets  $V_1 := \{\mathbf{v} \in \mathbb{R}^p : \|\Sigma^{1/2}\mathbf{v}\|_2 = 1\}$  and  $V_2 := \{\mathbf{u} \in \mathbb{R}^n : \|\mathbf{u}\|_2 = 1\}$ , functions  $M(\mathbf{u}) := |\mathbf{u}^\top \mathbf{Z}^{(n)} \mathbf{v}|$  and

$$h(\mathbf{v}) := \|\mathbf{v}\|_1, \quad \bar{h}(\mathbf{u}) := \|\mathbf{u}\|_1, \quad g(r_1) := \frac{\mathcal{G}(\Sigma^{1/2}\mathbb{B}_1^p)}{\sqrt{n}} r_1, \quad \bar{g}(r_2) := \frac{\mathcal{G}(\mathbb{B}_1^n \cap \mathbb{B}_2^n/r_2)}{\sqrt{n}} r_2,$$

and constants  $c := 1$  and  $b := \sqrt{2/n}$ . The desired inequality follows from Lemma 6 combined with the fact that

$$\left[ \frac{\mathbf{v}}{\|\Sigma^{1/2}\mathbf{v}\|_2}; \frac{\mathbf{u}}{\|\mathbf{u}\|_2} \right] \in V_{\Sigma,1}(r_1) \times V_2(r_2),$$

for all  $[\mathbf{v}; \mathbf{u}] \in \mathbb{R}^p \times \mathbb{R}^n$  and the homogeneity of norms.  $\square$

**Lemma 7** ( $\text{TP}_\Sigma + \text{IP}_\Sigma \Rightarrow \text{ATP}_\Sigma$ ). *Let  $\mathbf{Z} \in \mathbb{R}^{n \times p}$  be a matrix satisfying  $\text{TP}_\Sigma(\mathbf{a}_1; \mathbf{a}_2)$  and  $\text{IP}_\Sigma(\mathbf{b}_1; \mathbf{b}_2; \mathbf{b}_3)$  for some positive numbers  $\mathbf{a}_1, \mathbf{a}_2, \mathbf{b}_1, \mathbf{b}_2$  and  $\mathbf{b}_3$ . Then, for any  $\alpha > 0$ ,  $\mathbf{Z}$  satisfies the  $\text{ATP}_\Sigma(\mathbf{c}_1; \mathbf{c}_2; \mathbf{c}_3)$  with constants  $\mathbf{c}_1 = \sqrt{\mathbf{a}_1^2 - \mathbf{b}_1 - \alpha^2}$ ,  $\mathbf{c}_2 = \mathbf{a}_2 + \mathbf{b}_2/\alpha$  and  $\mathbf{c}_3 = \mathbf{b}_3/\alpha$ . Taking  $\alpha = \mathbf{a}_1/2$ , we obtain that  $\text{ATP}_\Sigma(\mathbf{c}_1; \mathbf{c}_2; \mathbf{c}_3)$  holds with constants  $\mathbf{c}_1 = \sqrt{(3/4)\mathbf{a}_1^2 - \mathbf{b}_1 - \alpha^2}$ ,  $\mathbf{c}_2 = \mathbf{a}_2 + 2\mathbf{b}_2/\mathbf{a}_1$  and  $\mathbf{c}_3 = 2\mathbf{b}_3/\mathbf{a}_1$ .*

*Proof.* Simple algebra and the TP property entail

$$\begin{aligned} \mathbf{c}_1 \left\{ \|\Sigma^{1/2}\mathbf{v}\|_2^2 + \|\mathbf{u}\|_2^2 \right\}^{1/2} &= \left\{ \mathbf{a}_1^2 \|\Sigma^{1/2}\mathbf{v}\|_2^2 + \mathbf{a}_1^2 \|\mathbf{u}\|_2^2 - (\mathbf{b}_1 + \alpha^2)(\|\Sigma^{1/2}\mathbf{v}\|_2^2 + \|\mathbf{u}\|_2^2) \right\}^{1/2} \\ &\stackrel{\text{TP}_\Sigma}{\leq} \left\{ (\|\mathbf{Z}^{(n)}\mathbf{v}\|_2 + \mathbf{a}_2 \|\mathbf{u}\|_1)^2 + \mathbf{a}_1^2 \|\mathbf{u}\|_2^2 - (\mathbf{b}_1 + \alpha^2)(\|\Sigma^{1/2}\mathbf{v}\|_2^2 + \|\mathbf{u}\|_2^2) \right\}^{1/2} \\ &\leq \left\{ \|\mathbf{Z}^{(n)}\mathbf{v}\|_2^2 + \|\mathbf{u}\|_2^2 - (\mathbf{b}_1 + \alpha^2)(\|\Sigma^{1/2}\mathbf{v}\|_2^2 + \|\mathbf{u}\|_2^2) \right\}^{1/2} + \mathbf{a}_2 \|\mathbf{u}\|_1. \end{aligned}$$

By Young's inequality and IP, we get

$$\begin{aligned} \|\mathbf{Z}^{(n)}\mathbf{v}\|_2^2 + \|\mathbf{u}\|_2^2 &= \|\mathbf{Z}^{(n)}\mathbf{v} + \mathbf{u}\|_2^2 - 2\mathbf{u}^\top \mathbf{Z}^{(n)}\mathbf{v} \\ &\stackrel{\text{IP}_\Sigma}{\leq} \|\mathbf{Z}^{(n)}\mathbf{v} + \mathbf{u}\|_2^2 + 2\mathbf{b}_1 \|\Sigma^{1/2}\mathbf{v}\|_2 \|\mathbf{u}\|_2 + 2\mathbf{b}_2 \|\mathbf{v}\|_1 \|\mathbf{u}\|_2 + 2\mathbf{b}_3 \|\Sigma^{1/2}\mathbf{v}\|_2 \|\mathbf{u}\|_1 \\ &\stackrel{\text{Young}}{\leq} \|\mathbf{Z}^{(n)}\mathbf{v} + \mathbf{u}\|_2^2 + (\mathbf{b}_1 + \alpha^2)(\|\Sigma^{1/2}\mathbf{v}\|_2^2 + \|\mathbf{u}\|_2^2) + \frac{\mathbf{b}_2^2}{\alpha^2} \|\mathbf{v}\|_1^2 + \frac{\mathbf{b}_3^2}{\alpha^2} \|\mathbf{u}\|_1^2. \end{aligned}$$

To get the claimed result, it suffices to put the previous two inequalities together and to rearrange the terms.  $\square$

Proposition 3, Proposition 4 and Lemma 7 entail immediately that the  $\text{ATP}_\Sigma$  holds with high-probability.

**Corollary 1** ( $\text{ATP}_\Sigma$  property for correlated Gaussian designs). *Let  $\mathbf{Z} \in \mathbb{R}^{n \times p}$  be a random matrix with iid  $\mathcal{N}_p(0, \Sigma)$  rows. Suppose  $\delta \in (0, 1/7]$ ,  $n \geq 100$  and  $\alpha > 0$  are such that*

$$C_{n,\delta} := \left( 1 - \frac{4.3 + \sqrt{2 \log(9/\delta)}}{\sqrt{n}} \right)^2 - \sqrt{\frac{2}{n}} (4.8 + \sqrt{\log(81/\delta)}) - \alpha^2 > 0.$$

Then, with probability at least  $1 - 2\delta$ , the following property holds: for all  $[\mathbf{v}; \mathbf{u}] \in \mathbb{R}^{p+n}$ ,

$$\|\mathbf{Z}^{(n)}\mathbf{v} + \mathbf{u}\|_2 \geq C_{n,\delta}^{1/2} \left\| [\Sigma^{1/2}\mathbf{v}; \mathbf{u}] \right\|_2 - 1.2 \left( 1 + \frac{1}{\alpha} \right) \frac{\mathcal{G}(\Sigma^{1/2}\mathbb{B}_1^p)}{\sqrt{n}} \|\mathbf{v}\|_1 - \frac{1.2}{\alpha} \frac{\mathcal{G}(\|\mathbf{u}\|_1 \mathbb{B}_1^n \cap \|\mathbf{u}\|_2 \mathbb{B}_2^n)}{\sqrt{n}}.$$

**Remark 3.** The particular choice  $\alpha = 1/2$ , in conjunction with the bound (28) on the Gaussian width, leads to the simpler bound

$$\|\mathbf{Z}^{(n)}\mathbf{v} + \mathbf{u}\|_2 \geq C_{n,\delta}^{1/2} \left\| [\Sigma^{1/2}\mathbf{v}; \mathbf{u}] \right\|_2 - \frac{3.6\mathcal{G}(\Sigma^{1/2}\mathbb{B}_1^p)}{\sqrt{n}} \|\mathbf{v}\|_1 - 2.4\sqrt{\frac{2 \log n}{n}} \|\mathbf{u}\|_1$$

with

$$C_{n,\delta} = \frac{3}{4} - \frac{17.5 + 9.6\sqrt{2 \log(2/\delta)}}{\sqrt{n}}$$

657 **Remark 4.** If the goal was to fight against logarithmic factors, we could use a tighter bound on  
 658 the Gaussian width of a convex polytope (Bellec, 2017, Prop. 1). It allows us to replace the term  
 659  $\sqrt{2 \log n} \|\mathbf{u}\|_1$  by  $4\sqrt{1 \vee \log(8en\|\mathbf{u}\|_2^2/\|\mathbf{u}\|_1^2)} \|\mathbf{u}\|_1$ . On the one hand, if  $\|\mathbf{u}\|_1^2 \geq (o/e)\|\mathbf{u}\|_2^2$ , then

$$4\sqrt{1 \vee \log(8en\|\mathbf{u}\|_2^2/\|\mathbf{u}\|_1^2)} \|\mathbf{u}\|_1 \leq 4\sqrt{1 \vee \log(8e^2n/o)} \|\mathbf{u}\|_1. \quad (38)$$

660 On the other hand, if  $\|\mathbf{u}\|_1^2 \leq o\|\mathbf{u}\|_2^2$ , then we can use the fact that the function  $x \mapsto$   
 661  $x\sqrt{1 \vee \log(e/x^2)} =: \varphi(x)$  is increasing, we get

$$\begin{aligned} 4\sqrt{1 \vee \log(8en\|\mathbf{u}\|_2^2/\|\mathbf{u}\|_1^2)} \|\mathbf{u}\|_1 &= 4\sqrt{8en} \|\mathbf{u}\|_2 \varphi\left(\frac{\|\mathbf{u}\|_1}{\sqrt{8n} \|\mathbf{u}\|_2}\right) \\ &\leq 4\sqrt{8en} \|\mathbf{u}\|_2 \varphi(\sqrt{o/8en}) \\ &= 4\sqrt{eo} \|\mathbf{u}\|_2 \sqrt{1 + \log(8n/o)}. \end{aligned} \quad (39)$$

662 Combining (38) and (39), we get

$$\mathcal{G}(\|\mathbf{u}\|_1 \mathbb{B}_1^n \cap \|\mathbf{u}\|_2 \mathbb{B}_2^n) \leq 4(\|\mathbf{u}\|_1 + \sqrt{o} \|\mathbf{u}\|_2) \sqrt{2 + \log(8n/o)}.$$

663 If the proportion  $o/n$  is fixed, or tends to zero at a rate slower than polynomial in  $n$ , this latter bound  
 664 can be used to remove logarithmic terms.

## 665 10 Propositions imply theorems

666 The three theorems stated in the main body of the paper are simple consequences of the propositions  
 667 established in this supplementary material. The aim of this section is to quickly show how the  
 668 theorems can be derived from the corresponding propositions.

669 **Proof of Theorem 1** Theorem 1 is essentially a simplified version of Proposition 2. First, note that  
 670 condition on  $\lambda$  in Theorem 1, combined with the well-known upper bounds on the tails of maxima  
 671 of Gaussian random variables (Boucheron et al., 2013), implies that  $\lambda$  satisfies condition (iv) of  
 672 Proposition 2. Furthermore, under the conditions of the theorem, conditions (i)-(iii) of Proposition 2,  
 673 as well as (21) and (22), are satisfied with  $\gamma = 1$ ,  $a_1 = c_1 \leq 1$ ,  $a_2 = c_2$  and  $b_1 = 0$ . Replacing all  
 674 these values in the inequality of Proposition 2, we get the claim of Theorem 1.

675 **Proof of Theorem 2** From Proposition 3 and the fact that  $\mathcal{G}(\Sigma^{1/2} \mathbb{B}_1^p) \leq \sqrt{2 \log p}$ , we infer that  
 676 the  $\text{TP}_\Sigma$  is satisfied with appropriate constants  $a_1, a_2$  with probability at least  $1 - \delta$ . Similarly,  
 677 Proposition 4 and the aforementioned bound on the Gaussian width imply that the  $\text{IP}_\Sigma$  is satisfied  
 678 with appropriate constants with probability at least  $1 - \delta$ . In the intersection of these two events,  
 679 according to Remark 3,  $\text{ATP}_\Sigma$  is satisfied with  $c_1, c_2$  and  $c_3$  as in the claim of Theorem 2.

680 **Proof of Theorem 3** Under the condition  $\delta \geq 2e^{-d_2 n}$ , we check that  $a_1$  and  $c_1$  are constants.  
 681 Therefore, combining the claims of Theorem 1, Theorem 2 and Lemma 2, we get the claim of  
 682 Theorem 3.
